# Supplementary material for: Perceived moral traits of others differentiate the neural activation that underlies inequity-aversion
Source: PubMed Central journal article supplement (PMC5322339; doi:10.1038/srep43317), 2017-02-23
Supplement: srep43317-s1.pdf [file srep43317-s1.pdf]

1 **Supplementary materials**

2

3 **Perceived moral traits of others differentiate neural activations that underlie**  
4 **inequity-aversion**

5

6 Hironori Nakatani, Akitoshi Okanoya, Chisato Suzuki, Takeshi Asamizuya, Kenichi  
7 Ueno, Kang Cheng, and Kazuo Okanoya

8

9 **Methods**

10 **Cover story for the money-allocation experiment.** In the conventional dictator game,  
11 there are individual differences in the amounts of money allocated<sup>1</sup>; some are motivated  
12 to allocate money to others while others are not. Therefore, we made a cover story to  
13 motivate all participants to allocate money to others. The participant was asked to  
14 imagine him or herself as a coffee shop manager that planned to hire a part-time  
15 employee to run the shop on the upcoming 2-day weekend. The total salary budget for  
16 the manager and part-time employee was 32,000 Japanese yen (100 Japanese yen

17 approximately correspond to 1 USD). The participant was asked to determine the  
18 salaries for himself/herself and the employee.

19

20 **Parameter estimation of the decision utility function.** To estimate the decision utility  
21 function parameters, we defined a negative log-likelihood function and estimated the  
22 model parameters that minimized the log-likelihood with a brute-force search method  
23 on a grid segmentation of parameter space. The parameters to be estimated were  $a$  and  
24  $d$  in eq. (1) in the “Decision utility functions” section for model one,  $\alpha$  and  $\theta$  in eq.  
25 (2) for model two, and  $\alpha$ ,  $\gamma$  and  $\theta$  in eq. (3) for model three.

26

27 **Definition of anatomical ROIs.** We defined anatomical ROIs for the arMFC, caudate  
28 head, anterior insula, and amygdala for small volume correction analysis using the  
29 automated anatomical labeling (AAL) structural ROIs in MarsBar software<sup>2</sup>.

30 To define an anatomical ROI within the arMFC, we first defined that of the  
31 MFC. The MFC consisted of the cingulum\_ant-ROI, cingulum\_mid-ROI, and  
32 frontal\_sup\_medial-ROI of the AAL. Based on Fig. 3 in a previous study by Amodio

33 and Frith<sup>3</sup>, we limited the anatomical ROI of the MFC within the region of  $y > 40$  and  $0$   
34  $< z < 40$  to define the anatomical ROI within the arMFC. The number of voxels in the  
35 right arMFC and the left arMFC were 565 and 616, respectively.

36 We defined an anatomical ROI within the caudate head by limiting the  
37 caudate-ROI of the AAL within  $y > 0$  based on Robinson et al.<sup>4</sup>. The number of voxels  
38 in the right caudate head and the left caudate head were 256 and 245, respectively.

39 We defined an anatomical ROI within the anterior insula by limiting the  
40 insula-ROI of the AAL within  $y > 3$ , based on a study by Lancaster et al.<sup>5</sup>. The number  
41 of voxels in the right anterior insula and the left anterior insula were 306 and 332,  
42 respectively.

43 We used the amygdala-ROI of the AAL as an anatomical ROI of the  
44 amygdala. The number of voxels in the right amygdala and the left amygdala were 73  
45 and 65, respectively.

46

## 47 **References**

48 1. Fehr, E., Schmidt, K. M. A theory of fairness, competition, and cooperation. *Q. J.*

- 49        *Econ.* 144, 817-868 (1999).
- 50        2. Brett, M., Anton, J. L., Valabregue, R., & Poline, J. B. Region of interest analysis  
51        using an SPM toolbox [abstract] Presented at the 8<sup>th</sup> International Conference on  
52        Functional Mapping of the Human Brain, June 2-6, 2002, Sendai, Japan. Available  
53        on CD-ROM in Neuroimage, Vol 16, No 2.
- 54        3. Amodio, D. M. & Frith, C. D. Meeting of minds: the medial frontal cortex and  
55        social cognition. *Nat. Rev. Neurosci.* 7, 268-277 (2006).
- 56        4. Robinson, J. L. et al., The functional connectivity of the human caudate: an  
57        application of meta-analytic connectivity modelling with behavioural filtering.  
58        *Neuroimage* 60, 117-129 (2012).
- 59        5. Lancaster, J. L. et al., Bias between MNI and Talairach coordinates analysed using  
60        the ICBM-152 brain template. *Hum. Brain Mapp.* 28, 1194-1205 (2007).
- 61

62 **Table S1.**

63 The second model fit money allocation behaviour better than the other models. The  
 64 group mean and standard error ( $\mu$ : mean, se: standard error) of AIC values are given of  
 65 each model are provided for each type of moral trait partner (others).

| Model   | Others  | Number of parameters | Negative log likelihood ( $\mu \pm se$ ) | AIC ( $\mu \pm se$ ) |
|---------|---------|----------------------|------------------------------------------|----------------------|
| Model 1 | Good    | 2                    | 11.4 $\pm$ 1.0                           | 26.8 $\pm$ 2.0       |
|         | Neutral | 2                    | 20.9 $\pm$ 0.9                           | 45.8 $\pm$ 1.8       |
|         | Bad     | 2                    | 15.2 $\pm$ 1.0                           | 34.4 $\pm$ 2.0       |
| Model 2 | Good    | 2                    | 8.8 $\pm$ 0.8                            | 21.6 $\pm$ 1.6       |
|         | Neutral | 2                    | 6.9 $\pm$ 1.3                            | 17.8 $\pm$ 2.6       |
|         | Bad     | 2                    | 7.9 $\pm$ 0.9                            | 19.8 $\pm$ 1.8       |
| Model 3 | Good    | 3                    | 8.1 $\pm$ 0.9                            | 22.2 $\pm$ 1.8       |
|         | Neutral | 3                    | 6.5 $\pm$ 1.2                            | 19.0 $\pm$ 2.4       |
|         | Bad     | 3                    | 7.8 $\pm$ 0.9                            | 21.6 $\pm$ 1.8       |

---

|         |         |   |          |          |
|---------|---------|---|----------|----------|
|         | Good    | 0 | 26.7±0.3 | 53.4±0.6 |
| Model 4 | Neutral | 0 | 21.5±1.0 | 43.0±2.0 |
|         | Bad     | 0 | 25.1±0.4 | 50.2±0.8 |

---

66

67

68 **Table S2.**

69 The parameters of decision utility were modulated by the partner moral traits. Shown  
70 are the group mean and standard error ( $\mu$ : mean, se: standard error) of the gain  $\alpha$  of the  
71 difference in the outcomes between oneself and others, and threshold  $\theta$  of the  
72 perception of the unfairness in the money-allocation that reduce the decision utility  
73 value in eq. (2).

---

|         | Gain $\alpha$ ( $\mu \pm se$ ) | Threshold $\theta$ ( $\mu \pm se$ ) |
|---------|--------------------------------|-------------------------------------|
| Good    | 1.48 $\pm$ 0.03                | 16640 $\pm$ 320                     |
| Neutral | 1.56 $\pm$ 0.05                | 18880 $\pm$ 320                     |
| Bad     | 1.66 $\pm$ 0.07                | 21400 $\pm$ 640                     |

---

74

75

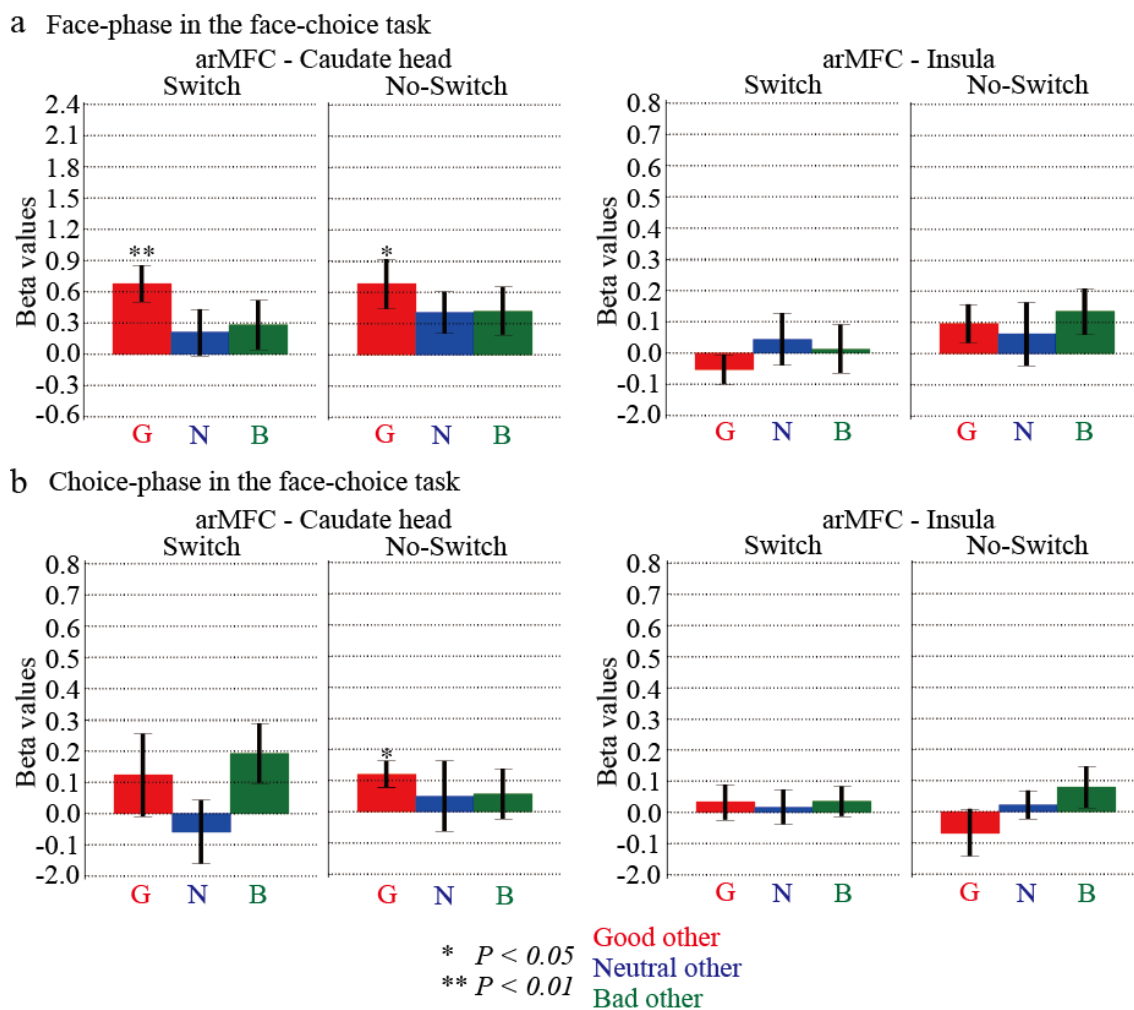

76

77

Fig. S1

78

79 **Fig. S1.** The strength of the functional connectivity between the right arMFC and the  
 80 right caudate head, and between the right arMFC and the right insula in the face-choice  
 81 task. Beta values that represent the strength of the connectivity between the right  
 82 arMFC and the right caudate head and between the right arMFC and the right insula in  
 83 the face-choice task are shown. Unlike the money-allocation task (Fig. 5), the right



84 arMFC and the right insula do not show significant strong functional connectivity in the  
85 face-phase of the face-choice task. a) The face-phase. b) The choice-phase. \*\* and \*  
86 indicate 1% and 5% significance levels, respectively.  
87
